# Supplementary material
Source: publisher figshare collection journal article supplement (https://acs.figshare.com/ndownloader/files/4033225)
Supplement: Supplementary file 1 [file 4033225]

 
data_shelxl 
 
_audit_creation_method            SHELXL-97 
_chemical_name_systematic 
; 
 ? 
; 
_chemical_name_common             ? 
_chemical_melting_point           ? 
_chemical_formula_moiety          ? 
_chemical_formula_sum 
 'C13 H14 N2 O3' 
_chemical_formula_weight          246.26 
 
loop_ 
 _atom_type_symbol 
 _atom_type_description 
 _atom_type_scat_dispersion_real 
 _atom_type_scat_dispersion_imag 
 _atom_type_scat_source 
 'C'  'C'   0.0181   0.0091 
 'International Tables Vol C Tables 4.2.6.8 and 6.1.1.4' 
 'H'  'H'   0.0000   0.0000 
 'International Tables Vol C Tables 4.2.6.8 and 6.1.1.4' 
 'N'  'N'   0.0311   0.0180 
 'International Tables Vol C Tables 4.2.6.8 and 6.1.1.4' 
 'O'  'O'   0.0492   0.0322 
 'International Tables Vol C Tables 4.2.6.8 and 6.1.1.4' 
 
_symmetry_cell_setting            monoclinic 
_symmetry_space_group_name_H-M    'P 21/c' 
 
loop_ 
 _symmetry_equiv_pos_as_xyz 
 'x, y, z' 
 '-x, y+1/2, -z+1/2' 
 '-x, -y, -z' 
 'x, -y-1/2, z-1/2' 
 
_cell_length_a                    12.4072(2) 
_cell_length_b                    13.2641(2) 
_cell_length_c                    7.61960(10) 
_cell_angle_alpha                 90.00 
_cell_angle_beta                  96.3700(10) 
_cell_angle_gamma                 90.00 
_cell_volume                      1246.22(3) 
_cell_formula_units_Z             4 
_cell_measurement_temperature     290(2) 
_cell_measurement_reflns_used     2328
_cell_measurement_theta_min       3.3292
_cell_measurement_theta_max       62.5617
 
_exptl_crystal_description        ? 
_exptl_crystal_colour             ? 
_exptl_crystal_size_max           0.36 
_exptl_crystal_size_mid           0.32 
_exptl_crystal_size_min           0.24 
_exptl_crystal_density_meas       ? 
_exptl_crystal_density_diffrn     1.313 
_exptl_crystal_density_method     'not measured' 
_exptl_crystal_F_000              520 
_exptl_absorpt_coefficient_mu     0.782 
_exptl_absorpt_correction_type    'multi-scan' 
_exptl_absorpt_correction_T_min   0.7661 
_exptl_absorpt_correction_T_max   0.8346 
_exptl_absorpt_process_details    
;
CrysAlisPro, Agilent Technologies,
Version 1.171.36.21 (release 14-08-2012 CrysAlis171 .NET)
(compiled Sep 14 2012,17:21:16)
Empirical absorption correction using spherical harmonics,
 implemented in SCALE3 ABSPACK scaling algorithm.
;
 
_exptl_special_details 
; 
 ? 
; 
 
_diffrn_ambient_temperature       290(2) 
_diffrn_radiation_wavelength      1.54184 
_diffrn_radiation_type            CuK\a 
_diffrn_radiation_source          'Enhance Ultra (Cu) X-ray Source'
_diffrn_radiation_monochromator   'mirror' 
_diffrn_measurement_device_type   'Gemini S Ultra, Agilent Technologies'
_diffrn_measurement_method        '\w scans'
_diffrn_detector_area_resol_mean  15.9149  
_diffrn_standards_number          ? 
_diffrn_standards_interval_count  ? 
_diffrn_standards_interval_time   ? 
_diffrn_standards_decay_%         ? 
_diffrn_reflns_number             4696 
_diffrn_reflns_av_R_equivalents   0.0155 
_diffrn_reflns_av_sigmaI/netI     0.0173 
_diffrn_reflns_limit_h_min        -14 
_diffrn_reflns_limit_h_max        14 
_diffrn_reflns_limit_k_min        -6 
_diffrn_reflns_limit_k_max        15 
_diffrn_reflns_limit_l_min        -8 
_diffrn_reflns_limit_l_max        8 
_diffrn_reflns_theta_min          3.58 
_diffrn_reflns_theta_max          62.65 
_reflns_number_total              1963 
_reflns_number_gt                 1730 
_reflns_threshold_expression      >2sigma(I) 
 
_computing_data_collection        'CrysAlisPro (Agilent Technologies)'
_computing_cell_refinement        'CrysAlisPro (Agilent Technologies)'
_computing_data_reduction         'CrysAlisPro (Agilent Technologies)'
_computing_structure_solution     'SHELXS-97 (Sheldrick, 1997)'
_computing_structure_refinement   'SHELXL-97 (Sheldrick, 1997)'
_computing_molecular_graphics     'Ortep-3 (L. J. Farrugia, 2001)'
_computing_publication_material   SHELXL-97 
 
_refine_special_details 
; 
 Refinement of F^2^ against ALL reflections.  The weighted R-factor wR and 
 goodness of fit S are based on F^2^, conventional R-factors R are based 
 on F, with F set to zero for negative F^2^. The threshold expression of 
 F^2^ > 2sigma(F^2^) is used only for calculating R-factors(gt) etc. and is 
 not relevant to the choice of reflections for refinement.  R-factors based 
 on F^2^ are statistically about twice as large as those based on F, and R- 
 factors based on ALL data will be even larger. 
; 
 
_refine_ls_structure_factor_coef  Fsqd  
_refine_ls_matrix_type            full 
_refine_ls_weighting_scheme       calc  
_refine_ls_weighting_details 
 'calc w=1/[\s^2^(Fo^2^)+(0.0588P)^2^+0.2400P] where P=(Fo^2^+2Fc^2^)/3' 
_atom_sites_solution_primary      direct 
_atom_sites_solution_secondary    difmap 
_atom_sites_solution_hydrogens    geom 
_refine_ls_hydrogen_treatment     mixed 
_refine_ls_extinction_method      none 
_refine_ls_extinction_coef        ? 
_refine_ls_number_reflns          1963 
_refine_ls_number_parameters      165 
_refine_ls_number_restraints      0 
_refine_ls_R_factor_all           0.0444 
_refine_ls_R_factor_gt            0.0397 
_refine_ls_wR_factor_ref          0.1102 
_refine_ls_wR_factor_gt           0.1056 
_refine_ls_goodness_of_fit_ref    1.042 
_refine_ls_restrained_S_all       1.042 
_refine_ls_shift/su_max           0.000 
_refine_ls_shift/su_mean          0.000 
 
loop_ 
 _atom_site_label 
 _atom_site_type_symbol 
 _atom_site_fract_x 
 _atom_site_fract_y 
 _atom_site_fract_z 
 _atom_site_U_iso_or_equiv 
 _atom_site_adp_type 
 _atom_site_occupancy 
 _atom_site_symmetry_multiplicity 
 _atom_site_calc_flag 
 _atom_site_refinement_flags 
 _atom_site_disorder_assembly 
 _atom_site_disorder_group 
O3 O 0.36068(8) 0.54812(9) -0.01200(16) 0.0605(3) Uani 1 1 d . . . 
O2 O -0.19509(9) 0.73892(9) 0.17169(18) 0.0665(4) Uani 1 1 d . . . 
O1 O -0.42415(10) 0.82358(12) 0.02377(18) 0.0802(4) Uani 1 1 d . . . 
N2 N 0.25129(10) 0.57409(10) -0.00409(17) 0.0514(4) Uani 1 1 d . . . 
N1 N 0.20846(14) 0.93140(13) 0.0252(2) 0.0769(5) Uani 1 1 d . . . 
C10 C 0.24296(12) 0.65383(12) 0.08860(19) 0.0469(4) Uani 1 1 d . . . 
C6 C 0.09079(12) 0.78104(11) 0.10287(19) 0.0463(4) Uani 1 1 d . . . 
C5 C -0.01717(13) 0.80381(12) 0.1242(2) 0.0510(4) Uani 1 1 d . . . 
H5 H -0.0406 0.8705 0.1211 0.061 Uiso 1 1 calc R . . 
C11 C 0.15862(13) 0.86424(13) 0.0628(2) 0.0538(4) Uani 1 1 d . . . 
C12 C 0.36430(14) 0.45745(13) -0.1118(2) 0.0613(5) Uani 1 1 d . . . 
H12A H 0.4383 0.4367 -0.1130 0.092 Uiso 1 1 calc R . . 
H12B H 0.3323 0.4691 -0.2306 0.092 Uiso 1 1 calc R . . 
H12C H 0.3247 0.4055 -0.0589 0.092 Uiso 1 1 calc R . . 
C15 C 0.33813(13) 0.71047(14) 0.1788(2) 0.0609(5) Uani 1 1 d . . . 
H15A H 0.3127 0.7664 0.2426 0.091 Uiso 1 1 calc R . . 
H15B H 0.3823 0.7348 0.0920 0.091 Uiso 1 1 calc R . . 
H15C H 0.3803 0.6664 0.2593 0.091 Uiso 1 1 calc R . . 
C8 C 0.05378(12) 0.60645(12) 0.1334(2) 0.0497(4) Uani 1 1 d . . . 
H8 H 0.0765 0.5396 0.1367 0.060 Uiso 1 1 calc R . . 
C7 C 0.12885(12) 0.68201(11) 0.10834(18) 0.0450(4) Uani 1 1 d . . . 
C1 C -0.42873(16) 0.90896(17) 0.1354(3) 0.0788(6) Uani 1 1 d . . . 
H1A H -0.4925 0.9170 0.1970 0.095 Uiso 1 1 calc R . . 
H1B H -0.3971 0.9714 0.0991 0.095 Uiso 1 1 calc R . . 
C9 C -0.05237(12) 0.62758(12) 0.1534(2) 0.0528(4) Uani 1 1 d . . . 
H9 H -0.1003 0.5753 0.1693 0.063 Uiso 1 1 calc R . . 
C4 C -0.08873(12) 0.72698(12) 0.1498(2) 0.0506(4) Uani 1 1 d . . . 
C3 C -0.23853(14) 0.83818(13) 0.1756(3) 0.0613(5) Uani 1 1 d . . . 
H3A H -0.2262 0.8746 0.0692 0.074 Uiso 1 1 calc R . . 
H3B H -0.2043 0.8749 0.2769 0.074 Uiso 1 1 calc R . . 
C2 C -0.35678(14) 0.82721(14) 0.1875(2) 0.0614(5) Uani 1 1 d . . . 
H2 H -0.3776 0.7834 0.2817 0.074 Uiso 1 1 calc R . . 
 
loop_ 
 _atom_site_aniso_label 
 _atom_site_aniso_U_11 
 _atom_site_aniso_U_22 
 _atom_site_aniso_U_33 
 _atom_site_aniso_U_23 
 _atom_site_aniso_U_13 
 _atom_site_aniso_U_12 
O3 0.0389(6) 0.0626(7) 0.0797(8) -0.0125(6) 0.0058(5) -0.0007(5) 
O2 0.0468(7) 0.0489(7) 0.1054(10) 0.0006(6) 0.0159(6) 0.0017(5) 
O1 0.0618(8) 0.0998(11) 0.0778(9) -0.0226(8) 0.0024(6) 0.0007(7) 
N2 0.0376(7) 0.0560(8) 0.0606(8) -0.0014(6) 0.0049(6) -0.0010(6) 
N1 0.0854(12) 0.0664(10) 0.0775(11) 0.0073(8) 0.0027(8) -0.0289(9) 
C10 0.0437(8) 0.0496(9) 0.0469(8) 0.0004(7) 0.0031(6) -0.0050(7) 
C6 0.0478(9) 0.0457(8) 0.0447(8) -0.0012(6) 0.0017(6) -0.0072(7) 
C5 0.0527(9) 0.0410(8) 0.0587(9) -0.0011(7) 0.0039(7) -0.0010(7) 
C11 0.0567(10) 0.0500(10) 0.0537(9) -0.0011(7) 0.0021(7) -0.0093(8) 
C12 0.0507(10) 0.0589(10) 0.0746(11) -0.0084(8) 0.0076(8) 0.0035(8) 
C15 0.0490(9) 0.0682(11) 0.0639(10) -0.0099(8) -0.0015(7) -0.0071(8) 
C8 0.0477(9) 0.0419(8) 0.0590(9) 0.0016(7) 0.0036(7) -0.0014(6) 
C7 0.0450(8) 0.0466(8) 0.0425(8) -0.0014(6) 0.0011(6) -0.0038(6) 
C1 0.0646(12) 0.0732(13) 0.0998(15) -0.0064(11) 0.0147(10) 0.0136(10) 
C9 0.0468(9) 0.0441(9) 0.0673(10) 0.0022(7) 0.0061(7) -0.0061(7) 
C4 0.0432(8) 0.0492(9) 0.0596(9) -0.0006(7) 0.0060(7) -0.0014(7) 
C3 0.0552(10) 0.0493(10) 0.0787(12) -0.0050(8) 0.0046(8) 0.0043(8) 
C2 0.0606(11) 0.0599(11) 0.0644(11) -0.0054(8) 0.0100(8) 0.0058(8) 
 
_geom_special_details 
; 
 All esds (except the esd in the dihedral angle between two l.s. planes) 
 are estimated using the full covariance matrix.  The cell esds are taken 
 into account individually in the estimation of esds in distances, angles 
 and torsion angles; correlations between esds in cell parameters are only 
 used when they are defined by crystal symmetry.  An approximate (isotropic) 
 treatment of cell esds is used for estimating esds involving l.s. planes. 
; 
 
loop_ 
 _geom_bond_atom_site_label_1 
 _geom_bond_atom_site_label_2 
 _geom_bond_distance 
 _geom_bond_site_symmetry_2 
 _geom_bond_publ_flag 
O3 N2 1.4081(16) . ? 
O3 C12 1.426(2) . ? 
O2 C4 1.3576(19) . ? 
O2 C3 1.424(2) . ? 
O1 C1 1.421(2) . ? 
O1 C2 1.423(2) . ? 
N2 C10 1.282(2) . ? 
N1 C11 1.139(2) . ? 
C10 C7 1.488(2) . ? 
C10 C15 1.500(2) . ? 
C6 C7 1.395(2) . ? 
C6 C5 1.400(2) . ? 
C6 C11 1.441(2) . ? 
C5 C4 1.380(2) . ? 
C5 H5 0.9300 . ? 
C12 H12A 0.9600 . ? 
C12 H12B 0.9600 . ? 
C12 H12C 0.9600 . ? 
C15 H15A 0.9600 . ? 
C15 H15B 0.9600 . ? 
C15 H15C 0.9600 . ? 
C8 C9 1.371(2) . ? 
C8 C7 1.396(2) . ? 
C8 H8 0.9300 . ? 
C1 C2 1.432(3) . ? 
C1 H1A 0.9700 . ? 
C1 H1B 0.9700 . ? 
C9 C4 1.393(2) . ? 
C9 H9 0.9300 . ? 
C3 C2 1.487(2) . ? 
C3 H3A 0.9700 . ? 
C3 H3B 0.9700 . ? 
C2 H2 0.9800 . ? 
 
loop_ 
 _geom_angle_atom_site_label_1 
 _geom_angle_atom_site_label_2 
 _geom_angle_atom_site_label_3 
 _geom_angle 
 _geom_angle_site_symmetry_1 
 _geom_angle_site_symmetry_3 
 _geom_angle_publ_flag 
N2 O3 C12 108.45(11) . . ? 
C4 O2 C3 119.06(13) . . ? 
C1 O1 C2 60.47(12) . . ? 
C10 N2 O3 111.24(12) . . ? 
N2 C10 C7 113.49(13) . . ? 
N2 C10 C15 123.91(14) . . ? 
C7 C10 C15 122.50(14) . . ? 
C7 C6 C5 121.65(14) . . ? 
C7 C6 C11 121.58(14) . . ? 
C5 C6 C11 116.63(14) . . ? 
C4 C5 C6 119.74(14) . . ? 
C4 C5 H5 120.1 . . ? 
C6 C5 H5 120.1 . . ? 
N1 C11 C6 176.78(18) . . ? 
O3 C12 H12A 109.5 . . ? 
O3 C12 H12B 109.5 . . ? 
H12A C12 H12B 109.5 . . ? 
O3 C12 H12C 109.5 . . ? 
H12A C12 H12C 109.5 . . ? 
H12B C12 H12C 109.5 . . ? 
C10 C15 H15A 109.5 . . ? 
C10 C15 H15B 109.5 . . ? 
H15A C15 H15B 109.5 . . ? 
C10 C15 H15C 109.5 . . ? 
H15A C15 H15C 109.5 . . ? 
H15B C15 H15C 109.5 . . ? 
C9 C8 C7 122.14(15) . . ? 
C9 C8 H8 118.9 . . ? 
C7 C8 H8 118.9 . . ? 
C6 C7 C8 116.84(14) . . ? 
C6 C7 C10 123.80(13) . . ? 
C8 C7 C10 119.36(14) . . ? 
O1 C1 C2 59.84(12) . . ? 
O1 C1 H1A 117.8 . . ? 
C2 C1 H1A 117.8 . . ? 
O1 C1 H1B 117.8 . . ? 
C2 C1 H1B 117.8 . . ? 
H1A C1 H1B 114.9 . . ? 
C8 C9 C4 120.29(15) . . ? 
C8 C9 H9 119.9 . . ? 
C4 C9 H9 119.9 . . ? 
O2 C4 C5 125.50(14) . . ? 
O2 C4 C9 115.17(13) . . ? 
C5 C4 C9 119.33(15) . . ? 
O2 C3 C2 106.80(14) . . ? 
O2 C3 H3A 110.4 . . ? 
C2 C3 H3A 110.4 . . ? 
O2 C3 H3B 110.4 . . ? 
C2 C3 H3B 110.4 . . ? 
H3A C3 H3B 108.6 . . ? 
O1 C2 C1 59.68(12) . . ? 
O1 C2 C3 115.93(15) . . ? 
C1 C2 C3 119.85(18) . . ? 
O1 C2 H2 116.4 . . ? 
C1 C2 H2 116.4 . . ? 
C3 C2 H2 116.4 . . ? 
 
_diffrn_measured_fraction_theta_max    0.979 
_diffrn_reflns_theta_full              62.65 
_diffrn_measured_fraction_theta_full   0.979 
_refine_diff_density_max    0.177 
_refine_diff_density_min   -0.154 
_refine_diff_density_rms    0.029 
